# Supplementary material for: The Longevity-Associated Variant of BPIFB4 Reduces Senescence in Glioma Cells and in Patients’ Lymphocytes Favoring Chemotherapy Efficacy
Source: MDPI journal article supplement (doi:10.3390/cells11020294), 2022-01-15
Supplement: s1 [file s1]

## Supplementary Figures

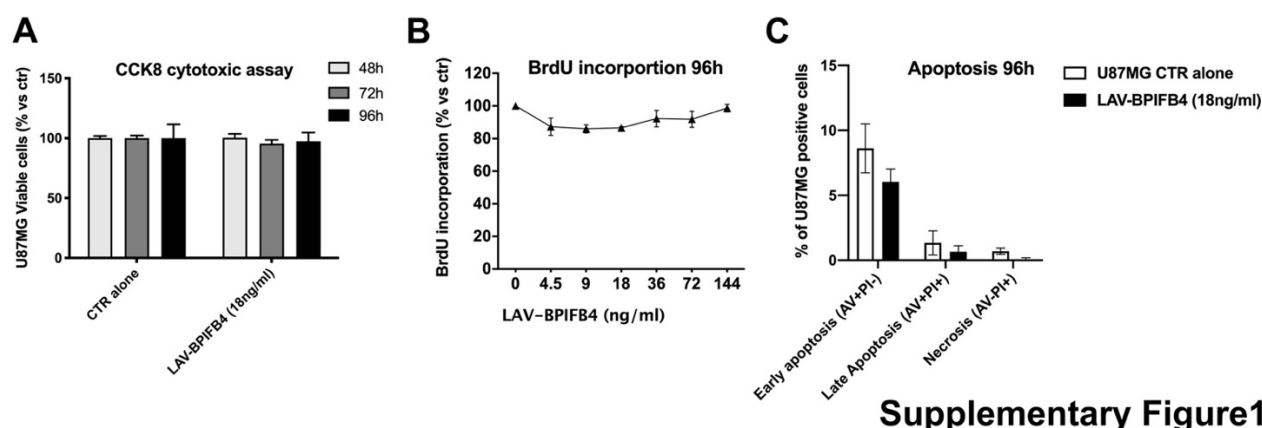

**Supplementary Figure1**

**Supplementary Figure 1. Effects of rhLAV-BPIFB4 on growth and cellular integrity of human U87-MG glioblastoma cell line.** **A** U87-MG cells were cultured in time course in the presence of the rhLAV-BPIFB4 before conducting the cytotoxic assay, using Cell Counting Kit-8 (*as better detailed in M&M section*). Results are expressed as means  $\pm$  SD of 3 independent experiments performed in triplicate and reported as percentage of viable cells vs the untreated control. **B** U87-MG cells were cultured for 96h in the presence of the indicated concentrations (0–144  $\mu$ M) of LAV-BPIFB4 before analysis of cell proliferation by BrdU incorporation assay. Results are expressed as means  $\pm$  SD of 3 independent experiments performed in triplicate and reported as percentage vs the untreated control. **C** Induction of apoptosis measured by annexin V and propidium iodide (PI) double staining through flow cytometry in 96h LAV-BPIFB4-treated U87-MG cells. Histograms indicate total percentage of early (Annexin V-positive cells/ PI-negative cells) and late apoptotic events (Annexin V/ PI-double positive cells) as well as necrotic cells (Annexin V-negative cells/ PI-positive cells). Results are representative of 3 independent experiments and expressed as mean  $\pm$  SD.

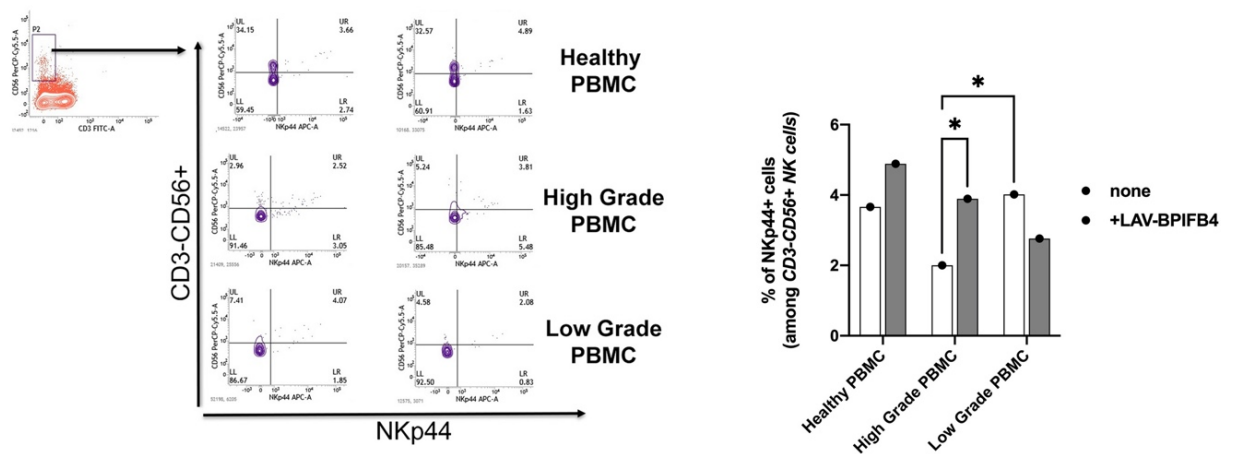

**Supplementary Figure 2**

**Supplementary Figure 2. Effects of rhLAV-BPIFB4 on the NKp44 expression on primary NK cells from GBM patients.** FACS analysis of NKp44 NCR receptor on CD3-/CD56+ positive NK cells among PBMC from healthy and *low and high grade* glioblastoma patients in basal condition and after 48h treatment with rhLAV-BPIFB4. The *left panel* shows the gating strategy and dot plot analysis from representative patients. The *right panel* is a bar graph showing the mean values percentage  $\pm$  SD of NKp44+ positive cells based on at least 3 independent experiments and evaluated by ANOVA (\*P < 0.05, compared with untreated cells).

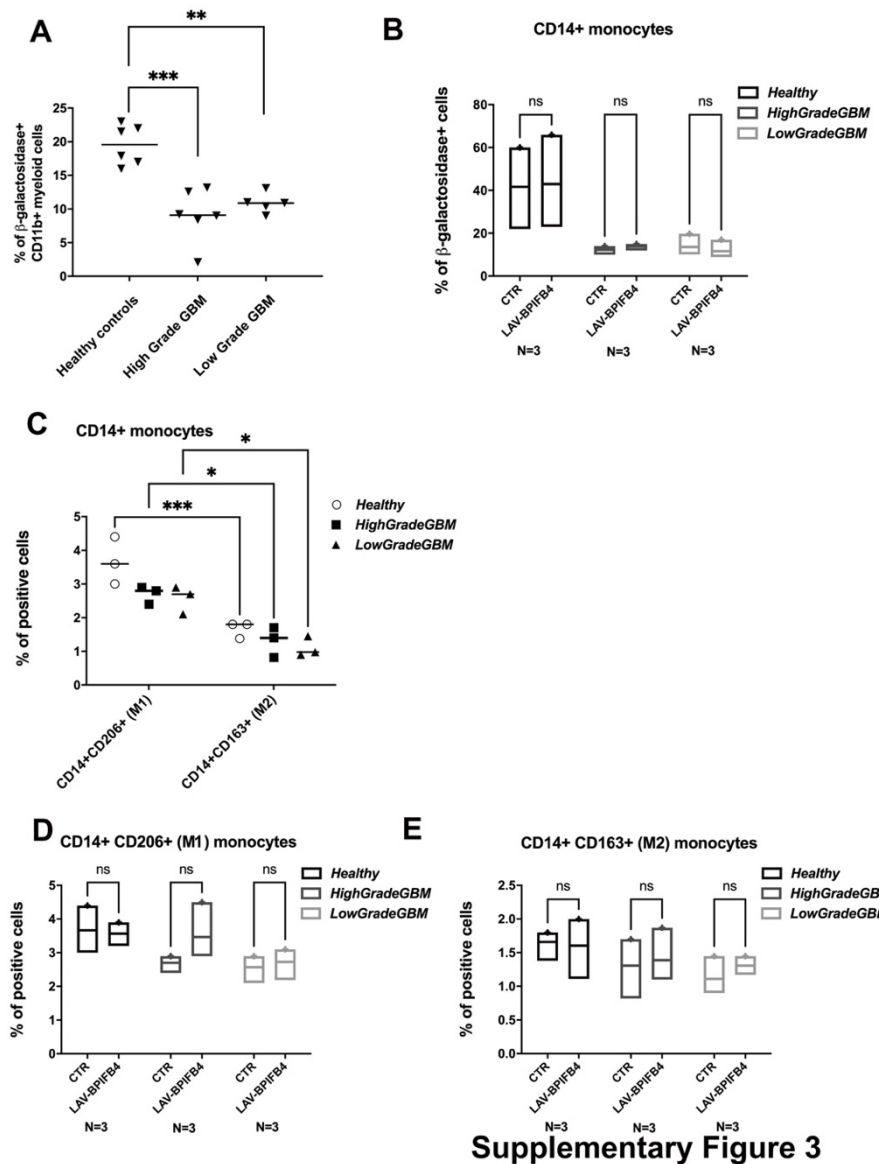

**Supplementary Figure 3**

**Supplementary Figure 3. Analysis of the monocyte profile in PBMC of healthy donor and GBM patients.** **A** Cytofluorimetric analysis of the immune senescence through Spider- $\beta$  Galactosidase staining. The bar graph shows the percentage of Spider- $\beta$  Galactosidase positive stained cells among CD11b+ myeloid cells and **B** in CD14+ positive cells in absence or presence of rhLAV-BPIFB4 at 18ng/ml for 48h. Healthy donor n=3, High grade GBM n=3 and low grade GBM n=3. **C** Cytofluorimetric analysis of M1/M2 balance in CD14+ positive cells from GBM patients (*low* and *high* grade) and healthy control, for comparison, using CD206 as M1 marker and CD163 as M2 marker. The graph represents the percentage of positive cells for the indicated markers. **D-E** Effects of rhLAV-BPIFB4 treatment on M1/M2 balance in patients and healthy donor's PBMC. Pairwise comparisons

statistically significant are indicated (\* $P < 0.05$ , \*\* $P < 0.01$ , \*\*\* $P < 0.001$ ). Statistical evaluation was carried out by ordinary 2-way ANOVA corrected for Šídák's multiple comparisons test (GraphPad® Prism).
